# Supplementary material
Source: PubMed Central journal article supplement (PMC6372244)
Supplement: NIHMS1001916-supplement-figures.pdf [file NIHMS1001916-supplement-figures.pdf]

|       |                                   |       |           |       |                        |                 |    |
|-------|-----------------------------------|-------|-----------|-------|------------------------|-----------------|----|
| Pc77  | --MKLSTSVLSVLVIAVELTVCMEFD        | ---   | FSEAIS    | CSEQC | PWGAGV                 | PVCGQRSMEKKTFTS | 55 |
| Pc266 | --MTLTSALSIVIIAVAYSVCMLDKQVYSKDID | ---   | CTASCLVEY | -     | KPVCAOKDESEKPEFGN      | 57              |    |
| Kazal | MKMKLSTSTFSVVVIAVELTVCMEFD        | ---   | FGEAGN    | CPKTC | TVTN-QHVCQORVNEELRTENS | 56              |    |
|       |                                   |       |           |       |                        |                 |    |
| Pc77  | KCHFDYYNOCVSGGWVLLKYSSC           | --    |           |       |                        |                 | 78 |
| Pc266 | IC                                | ----- |           |       |                        |                 | 59 |
| Kazal | LCEMEKENLCSGGWTKLNKNGHCST         |       |           |       |                        |                 | 81 |

|                |                                                               |     |
|----------------|---------------------------------------------------------------|-----|
| Pc60           | MP--IALFFFFYSLLLGTSLGQQYGSN-----RTLNKVLGNVGNVVNQCIDLEHERVKL   | 51  |
| Pc61           | MKQSIATIEFSLGLLHYVAHCAPYIILNSLLSTSSDYLNKINKTAKAVGOVLSLTNGTTQL | 60  |
| hemolysin-like | MA--IALLEFFCSLLLATSLSG-QYGD-----RTLLNQMFGGVADVNNQCIDVAQDNVKL  | 50  |
| Pc60           | TTKLTNSGVEHGTNIGKMGVAAGATLSSOGLGGGTDLAKEGLELVGTVGEIIPGAG-VPV  | 110 |
| Pc61           | GTSLTSSGTYSMATSTAKACLSSATTFGKEAMSETVIYSDKGLDFVSNITGSIPVVG-EQI | 119 |
| hemolysin-like | TTQLTSSAVEHGTNLGKMGVAAGTILTSKGLGGVTDLGKQGLDLVGTIAEVIPGADLLPV  | 110 |
| Pc60           | NYVTEAKTGLTIVNNLCQKGIKVTTHLCNQALDNTKTIITKIASCTVENFSSARTGVAKK  | 170 |
| Pc61           | EQITGIGKLSLDLGQSTCKDVIDLTESYCKAGLTTINTGTQLTTGAIGGIAHGGAELGK-  | 178 |
| hemolysin-like | RTVIDICKTGVSVLNNICQEGIKSASYLCNEVLDKTKLAKLTTCTVENLSSAGTAIAKG   | 170 |
| Pc60           | TVSTGLNALANVLNTGMDAGMALVPGTTTQPNSPENSQPVSEPAPESSNAVSSLIQRGWS  | 230 |
| Pc61           | ---OGTQAAANLITSGITRGVQAITG-----TPEIA-----                     | 207 |
| hemolysin-like | AVSTGANAVANVLNTGMDALMAFVPGGSSKTNAIQDITKAITQPGIAKPNPENKIAKPES  | 230 |
| Pc60           | YFGGNQDNYYK-----                                              | 241 |
| Pc61           | -----                                                         | 206 |
| hemolysin-like | KSSGGLGSYLTSGLSFFGR                                           | 249 |

A

|      |                                                                   |     |
|------|-------------------------------------------------------------------|-----|
| Pc24 | MEMFMILLVSYLSVHSGKINECNMKNITMHVVTWNVNGERPT-CLLKLLGQFQEKDEDE       | 59  |
| Pc29 | MKLKILLLLFLFVS-LYAK---EAPENPRTVYVVVTWNVGEEENPPGSVKELLGQISSKDELN   | 56  |
| Pc31 | MKLKILLLLFLFVS-LYAK---EAPENPRTVYVVVTWNVGEEENPPGSVKELLGQISSKDELN   | 56  |
| Pc32 | MKLKILLLLFLFVS-LYAK---EAPENPRTVYVVVTWNVGEEENPPGSVKELLGQISSKDELN   | 56  |
| IP5P | MNLKILLLLFSFAS-LYAKYSKAAEDNPRSVYVVVTWNVAAEKDPPGSVKELLGQVSDSSEVN   | 59  |
|      |                                                                   |     |
| Pc24 | PDMVIVGLQEVTKSIDTALKDYFLGNRWEASTGDILES-NDYVKVETASLFGMFLNVYVK      | 118 |
| Pc29 | PDIIIVGLQEVTMNPIKALKKNKLVGDKWSEIDDDILKSNNNYAKIYSESLGMLLKVYVR      | 116 |
| Pc31 | PDIIIVGLQEVTMNPIKALKKNKLVGDKWSEIDDDILKSNNNYAKIYSESLGMLLKVYVR      | 116 |
| Pc32 | PDIIIVGLQEVTMNPIKALKKNKLVGDKWSEIDDDILKSNNNYAKIYSESLGMLLKVYVR      | 116 |
| IP5P | PDIVIIIGLQELTMNEVQAVVNNIFDKWSDDEFNEILKSRNNYHKVYSESLGILLKGVK       | 119 |
|      |                                                                   |     |
| Pc24 | IQHSWSVADVN-IRHIDTEYFRYDNGGGVIMKFRLYGRLECLVHAHL--HGONKTARIE       | 175 |
| Pc29 | IKYKVTLSKEKDATTVKTGKGFSGNKGAVIIKFKLNELSYCVVNSHLP AHDEKLEERID      | 176 |
| Pc31 | IKYKV--SKEKDATTVKTGKGFSGNKGAVIIKFKLNEQSYCVVNSHLP AHDEKLENERIE     | 174 |
| Pc32 | IKYKVTLSKEKDATTVKTGKGFSGNKGAVIIKFKLNEQSYCVVNSHLP AHDEKLEKERID     | 176 |
| IP5P | IKYKDSINKKADATTVKTGLGGM SGNKGAVIIKFKOLNNRWFCIVNSHLP AAHDEKLEQERIE | 179 |
|      |                                                                   |     |
| Pc24 | DYKEIEQIRTVFCENP SDYVFFLGDNLNFHIRKVIENLKTPEETHALIKDEKYDELLKEDEL   | 235 |
| Pc29 | DYKTINRERGKFCGN-SDYVFWLGDNLNFRLD--ESLKD-EKIRELVKQKFNELLQKDQL      | 232 |
| Pc31 | DYKTINRERGKFCGN-SDYVFWLGDNLNFRLD--ESLKD-EKIRELVNOKKFNELLQKDQL     | 230 |
| Pc32 | DYKTINRERGKFCGN-SDYVFWLGDNLNFRLD--ESLKD-EKIRELVKQKFNELLQKDQL      | 232 |
| IP5P | DYKTINNRVDFCNKPSDFIFWLGDNLNFRLO--EDVED-EKIRNWVQQRKYADLLKIDQL      | 236 |
|      |                                                                   |     |
| Pc24 | LYYKNANKIFRNYTEQPIKFPPTYKFL LKRNKSEYNLKRPAWTDRIILYKTESEREITPTI    | 295 |
| Pc29 | KVNHETKEIFGTENEQEIKFAPTFK--LEKKGGEYSKORRPAWTDREVLYKSDTSKIIKPT     | 290 |
| Pc31 | KVNHKTKEIFSTEKEQEIKFAPTFK--LEKKGGEYSKORRPAWTDREVLYKSGTSKIIKPT     | 288 |
| Pc32 | KVNHETKEIFGTENEQEIKFAPTFK--LEKKGGEYSKORRPAWTDREVLYKSDTSKIIKPT     | 290 |
| IP5P | KINKQTKEIFTDFENEKEITFAPTFK--LEKGTCTYSTKRRPAWTDRIILYKSDTKKNIKPT    | 294 |
|      |                                                                   |     |
| Pc24 | SYNSMEDHRKSDHYPV EAI-----                                         | 314 |
| Pc29 | LYQSITSYIQSDHYPVQAQFFIANK                                         | 315 |
| Pc31 | LYQSITSYKQSDHYPVQAQFFIANK                                         | 313 |
| Pc32 | LYQSITSYIQSDHYPVQAQFFIANK                                         | 315 |
| IP5P | LYKSIESYKHS DHYPVQAQFDIKY-                                        | 318 |

B

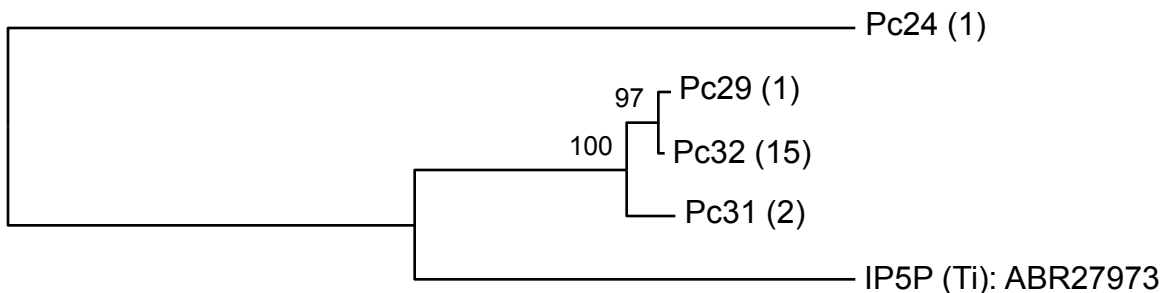

Fig. S3

A

|                                |                                                                |     |
|--------------------------------|----------------------------------------------------------------|-----|
| Pc80                           | MAKHCSLVFSLLA-FALIYS-----LLSSANTCSN-----SNQFLG---              | 36  |
| Pc294                          | MANTHYSLVFSLLT-LALIDSL-----VASTQLACKN-----SNILLG---            | 37  |
| <i>Triatoma infestans</i>      | MAKAHSSLVFCLLA-LALVR-----FAQAKCTN-----GYTFLG---                | 33  |
| <i>Triatoma dimidiata</i>      | MAKTQCPLVFSLLA-LALIGN-----LPSSAAQCKN-----ESNTFIA---            | 37  |
| <i>Rhodnius prolixus</i>       | MVQYCSLEV-GLLASIVLLSSMVLVRPGRPVPG---SDPLRKRVRSSCVDPLKKVIG---   | 53  |
| <i>Phlebotomus argentipes</i>  | MWHIKHFLFFVALFVVVHTQTN-YCQPKLCTFGPGLPARPHIGCKNSGQFDRKTCPK-DA   | 58  |
| <i>Phlebotomus duboscqi</i>    | MLQIKNLLVIVVLFVTVQSQNEKYCDQNLCTSNN--VVKPHIGCKNDGQFK-KSCPG-DA   | 56  |
| <i>Lutzomyia longipalpis</i>   | MLQIKHLLIFVGLLVVNAQSN-YCKQESCSGG--VERPHIGCKNSGDFS-ETCSG-DA     | 55  |
| <i>Drosophila melanogaster</i> | MQPSAVLLTTIMII-----SCE-----VAFACNG-KI                          | 27  |
| <i>Anopheles sinensis</i>      | MARWIFVLGVLGGLLSLQARSNYCTTSYCR----AGVKNVGCNPPFFSGGWLKAGKNP     | 55  |
| <i>Aedes aegypti</i>           | MFTVN-----                                                     | 5   |
| <i>Apis mellifera</i>          | MAREGIIRLTLIFIF-----VSTGSADVSCI-----GKALL                      | 32  |
| <i>Vespula vulgaris</i>        | MEISGLVYLIIIVTIIIDLPYGKANNYCKIKCLKG---GVHTACKY--GSLKPNCGNKVV   | 54  |
| <i>Solenopsis invicta</i>      | MELI-VSILWLAITAENLANTLATNYCNLQCKR--NNAIHTMCOY--TSPTPGMCMLEY    | 55  |
| Pc80                           | -MKEIRKKEKQKLLDAHNKYREVTASCKALG-----YOPPAENMLETGWDNYAAQ        | 86  |
| Pc294                          | -LKTITTKDKQKLLDAHNRYRNLVASKSP-----ROPPAQNMRVLV-----            | 78  |
| <i>Triatoma infestans</i>      | -IKELSEKDKQKLLDFHNKFRLETAAGEAPAPKGEDGRERROPPAANMLETWHHKAQKQ    | 92  |
| <i>Triatoma dimidiata</i>      | -ELQLTEEEKQALLDAHNRYRETAAGNAHGK-----ROPPAQNMLELTDWDEHAAQ       | 88  |
| <i>Rhodnius prolixus</i>       | -LKNFDEKDKKLLLHEHNQYREKVAAGLAP-----NOPGAENMILLTWNSDAALQ        | 102 |
| <i>Phlebotomus argentipes</i>  | QLMPTITEDTKKFLFHINRRLRDRFARGSMSPE-----FQSAAKPMLKWNDELAKL       | 108 |
| <i>Phlebotomus duboscqi</i>    | EVVNLKSKQKNLFLKIHNRRLRDLAHGSVTP-----FQPAAKPMLKWNDELAKL         | 106 |
| <i>Lutzomyia longipalpis</i>   | EIVKMDKKKQNLVVMHNRLRDRFARGAVPG-----FAPAAPKMLKWNDELAKL          | 105 |
| <i>Drosophila melanogaster</i> | IASGITAEERSIILQEHNRRLQIVATGRYPG-----QPGAENMREIVWDELAAR         | 77  |
| <i>Anopheles sinensis</i>      | AVIEITPARQTLILNEHNTRRSQALALQQLWP-----FAPAKRMPITLAWDSELAQ       | 105 |
| <i>Aedes aegypti</i>           | -ESLIGSTDKYDILEHNKLRQAVAQGLIPG-----QPGAENMLEMOWDDELARK         | 54  |
| <i>Apis mellifera</i>          | KSDQVSCQDKQLILDEHNSLREKISFGEIQG-----MPSAANMRELTWDELAAM         | 82  |
| <i>Vespula vulgaris</i>        | VSYGLTKQEKQDILKEHNDEROKIARGLETRGN----PGPOPPAKMKNLVWDELAVV      | 109 |
| <i>Solenopsis invicta</i>      | SNVGFDAEKDAIVNKHNLRLRQVAVSCKEMRGT----NGPOPPAVKMPNLTWDELATI     | 110 |
| Pc80                           | ASSWANGCQFMHNDPKD-KKNKPMGQNLVYKMSKEEDVNTTFFNIWVD-YMVEGWYNESA   | 144 |
| Pc294                          | -----NHVIR-LSG-----FP-----DFIL-----EGK                         | 95  |
| <i>Triatoma infestans</i>      | AYKWARTCEWKHNNATD-KAGNSMGQNLGRKMSTEKTDVDDTFDKWSY-DLVRGWDFEAK   | 150 |
| <i>Triatoma dimidiata</i>      | ASSWARTCEFEHNLPTD-KQKQKLGQNLALRRSTRPSKAKVSFGYWMKNYMKVGFDFEAK   | 147 |
| <i>Rhodnius prolixus</i>       | AKAWASGCDFMHNNPESKNTKKPMGQNIYKMSIEKETLEKTFQRYIP-EMVKGWYDEVE    | 161 |
| <i>Phlebotomus argentipes</i>  | AEYNVRTCEFKHDQCRSANICPYAGQNLGQMTSYPDYLDLNYVIKNI TREWFLEYKLAQ   | 168 |
| <i>Phlebotomus duboscqi</i>    | AEYNVRTCKFAHDQCRATKICRYAGQNLGQMSFPEFLNTNIAIKNI TREWFREYKDATQ   | 166 |
| <i>Lutzomyia longipalpis</i>   | AEYNVRTCKFAHDKCRADIVCPYAGQNLGQMSYPTHRDLNLYKLNLTREWFREYRWAKQ    | 165 |
| <i>Drosophila melanogaster</i> | AQKWADNCQFRHDPRT-INRFTMGQNLAIWSTAPLHAD-DGDFPSR---IQSWFNEVQ     | 132 |
| <i>Anopheles sinensis</i>      | AANNARSCDFEKHDKCRNTAMYKYAGQNLAI SYFYGMSKSVEALIQEGIAGWNEFKD TTQ | 165 |
| <i>Aedes aegypti</i>           | AQDWADQCIKFKHPKKK-LGRFTMGQNLALIWSSASLDDDRSDFPGR---IRKWFDEVK    | 110 |
| <i>Apis mellifera</i>          | AQNWATKCAEIRDPRH-IRGFYVEQNLKTISSSTQFNDL--PDWRQT---IYNWFNEVQ    | 136 |
| <i>Vespula vulgaris</i>        | AQVWANQCQYGHDTCRD-VAKYQVQNLVALTGSTAAYKDDPVKLVKMWEDVKDYNPK--    | 166 |
| <i>Solenopsis invicta</i>      | AQRWANQCTFEHDACRN-VERFAVGQNLAAATSSSGKNKSTPNEMILLWYNEVKDFDNRWI  | 169 |
| Pc80                           | LYIFGSN-FS-----GKTAHYTQLVWATTARTICCGYSYYK-----NNWHVGYLVCNYSP   | 193 |
| Pc294                          | LF-----WI-----                                                 | 99  |
| <i>Triatoma infestans</i>      | LYKYGSG-FS-----MSTGHYTOVWVWANTSQVCGYSYYMQIDEYNQKWTGYLVCNYSP    | 204 |
| <i>Triatoma dimidiata</i>      | LYTFGSG-FS-----TATGHYTOVWVWAKSSKLCGYSYYTTYING-RKWYVGYLVCNYNP   | 200 |
| <i>Rhodnius prolixus</i>       | LYNFGDS-FS-----AATGHYTOVWVWNTTKVGCVYSYFKVDN-----GWYSGYLVCNYSP  | 211 |
| <i>Phlebotomus argentipes</i>  | SHTDMFTTSGKNG-KATGHFTAFIHEKSDKVGCAISKVFVNKYK----FKEYLVACNYCY   | 223 |
| <i>Phlebotomus duboscqi</i>    | DNTDMFTSG--RNGRQKIGHFTAFIHEKSDKVGCAVAKFTNNNK----FKEYLIACNYCY   | 220 |
| <i>Lutzomyia longipalpis</i>   | SQLDNYVGGPGKDN-KQIGHFTAFVHEKTDKVGCAIARFTNEHN----FKETLLACNYCY   | 220 |
| <i>Drosophila melanogaster</i> | KYSFGDA-WS-----PKTGHYSQLVWGETSLVCCGYAEYKDTSK----YNKLYVCNYGP    | 181 |
| <i>Anopheles sinensis</i>      | AQLDKYPNG--YTG-PAIGHFTOMASDQTNRTGCAMQYWKKDYK----WETYLYVCDYAL   | 218 |
| <i>Aedes aegypti</i>           | KYSFGAK-FS-----LATGHYMLIWDATYLVCCGYSYHYSGNK----YNKLYVCNYGP     | 159 |
| <i>Apis mellifera</i>          | YKGG-----ISHYNOIFWANSYLI CGGFTYYFDAGH-----YVKNYVCNYAP          | 179 |
| <i>Vespula vulgaris</i>        | KKFGGND--F-----LKTGHYTOVWVWANTKEVCGGSIKVIQ-----EKWHKHLYVCNYGP  | 214 |
| <i>Solenopsis invicta</i>      | SSFPSDDNIL----MKVGHYTOVWVWAKTTKICCGRIMFKEP----DNWTKHLYVCNYGP   | 220 |

Fig. S4

|                                |                                                                                                  |     |
|--------------------------------|--------------------------------------------------------------------------------------------------|-----|
| Pc80                           | AGNIFKENP <small>Y</small> VQGNQN--*CSGYGLDRS-TRYDHL <small>C</small> VKKNKKSQS                  | 235 |
| Pc294                          | -----                                                                                            | 99  |
| <i>Triatoma infestans</i>      | AGNFNNREPEI--SKEKCTDPKLESS-KNYKHL <small>C</small> VLKKKKKN                                      | 244 |
| <i>Triatoma dimidiata</i>      | GGNVKGEVPYKKCKVN--CGAHMLGRS-HNYTNLCIENQGNH                                                       | 239 |
| <i>Rhodnius prolixus</i>       | AGNWyGEAPYKEGSGT--CPGKFLEVASKQYPHLCCKKKKK                                                        | 250 |
| <i>Phlebotomus argentipes</i>  | T-NMMKEKVYTKCQPCSQCQS---KKCDsvYKHLCDASEVIEPIPDILKN-PRNGK                                         | 274 |
| <i>Phlebotomus duboscqi</i>    | T-NMMKEPIYTKCPPCSQCKN---KKCGTVYKNLCPADEKVDPTPEILKNQPRRG                                          | 271 |
| <i>Lutzomyia longipalpis</i>   | T-NMMKERIYTGKPCSQCQS---KKCGPVYKNLCPDSEKVDPTPDVLKQ-WKHGK                                          | 271 |
| <i>Drosophila melanogaster</i> | GGNVVGYNPYEVGK--PSCSTYGMKPS-SRYQGLCAAPGSSPAANSVYGANTIETYEGY                                      | 238 |
| <i>Anopheles sinensis</i>      | T-NMIGTAVYKKCPVGSQCTT-GINTS-AGLDGLCNPMEFINPVPN                                                   | 261 |
| <i>Aedes aegypti</i>           | AGNVQGVPIYITC--HPSCEQHGLQKS-STYPGLCAAGAGAGEVDPYHHDNVIPONYYSY                                     | 216 |
| <i>Apis mellifera</i>          | GDNVDGHLPEYQC--QPA <small>C</small> SNYKMTSS-SRFRGL <small>C</small> SAG                         | 214 |
| <i>Vespula vulgaris</i>        | SGNFMNEELYQTK                                                                                    | 227 |
| <i>Solenopsis invicta</i>      | AGNVLGAPIY <small>E</small> IKK                                                                  | 234 |
| Pc80                           | -----                                                                                            | 235 |
| Pc294                          | -----                                                                                            | 99  |
| <i>Triatoma infestans</i>      | -----                                                                                            | 244 |
| <i>Triatoma dimidiata</i>      | -----                                                                                            | 239 |
| <i>Rhodnius prolixus</i>       | -----                                                                                            | 250 |
| <i>Phlebotomus argentipes</i>  | -----                                                                                            | 274 |
| <i>Phlebotomus duboscqi</i>    | -----                                                                                            | 271 |
| <i>Lutzomyia longipalpis</i>   | -----                                                                                            | 271 |
| <i>Drosophila melanogaster</i> | NSSPSSQTANNNPPTNNINKSQFSYNQPRPKPVQITINPNPSPFNPQA <small>AA</small> VP <small>S</small> ASTFGGSSF | 298 |
| <i>Anopheles sinensis</i>      | -----                                                                                            | 261 |
| <i>Aedes aegypti</i>           | QAS-----SNNHENQHYTS---APVRPAYTAP--NHQOSYDNHILYN                                                  | 253 |
| <i>Apis mellifera</i>          | -----TNNYLGTRC                                                                                   | 223 |
| <i>Vespula vulgaris</i>        | -----                                                                                            | 227 |
| <i>Solenopsis invicta</i>      | -----                                                                                            | 234 |
| Pc80                           | -----                                                                                            | 235 |
| Pc294                          | -----                                                                                            | 99  |
| <i>Triatoma infestans</i>      | -----                                                                                            | 244 |
| <i>Triatoma dimidiata</i>      | -----                                                                                            | 239 |
| <i>Rhodnius prolixus</i>       | -----                                                                                            | 250 |
| <i>Phlebotomus argentipes</i>  | -----                                                                                            | 274 |
| <i>Phlebotomus duboscqi</i>    | -----                                                                                            | 271 |
| <i>Lutzomyia longipalpis</i>   | -----                                                                                            | 271 |
| <i>Drosophila melanogaster</i> | GSASRGGSHAYTTDPSQSAGRYKHKLEAYRPSAAEFESVHKHTILRTYIEQNQQRQDQ                                       | 358 |
| <i>Anopheles sinensis</i>      | -----                                                                                            | 261 |
| <i>Aedes aegypti</i>           | -----LVFDQHKQSQQQQQQHHYQPSHPQYP-SSHQOTYHHLPSPASVVTATTN                                           | 302 |
| <i>Apis mellifera</i>          | -----                                                                                            | 223 |
| <i>Vespula vulgaris</i>        | -----                                                                                            | 227 |
| <i>Solenopsis invicta</i>      | -----                                                                                            | 234 |
| Pc80                           | -----                                                                                            | 235 |
| Pc294                          | -----                                                                                            | 99  |
| <i>Triatoma infestans</i>      | -----                                                                                            | 244 |
| <i>Triatoma dimidiata</i>      | -----                                                                                            | 239 |
| <i>Rhodnius prolixus</i>       | -----                                                                                            | 250 |
| <i>Phlebotomus argentipes</i>  | -----                                                                                            | 274 |
| <i>Phlebotomus duboscqi</i>    | -----                                                                                            | 271 |
| <i>Lutzomyia longipalpis</i>   | -----                                                                                            | 271 |
| <i>Drosophila melanogaster</i> | QQQQQKEQDQQQQPEPSSTKKPSRGWSLLT-WRG                                                               | 392 |
| <i>Anopheles sinensis</i>      | -----                                                                                            | 261 |
| <i>Aedes aegypti</i>           | AAANLLKPGNILKSPFLSYR-----WDLLENFLH                                                               | 331 |
| <i>Apis mellifera</i>          | -----                                                                                            | 223 |
| <i>Vespula vulgaris</i>        | -----                                                                                            | 227 |
| <i>Solenopsis invicta</i>      | -----                                                                                            | 234 |

Fig. S4 (continued)

B

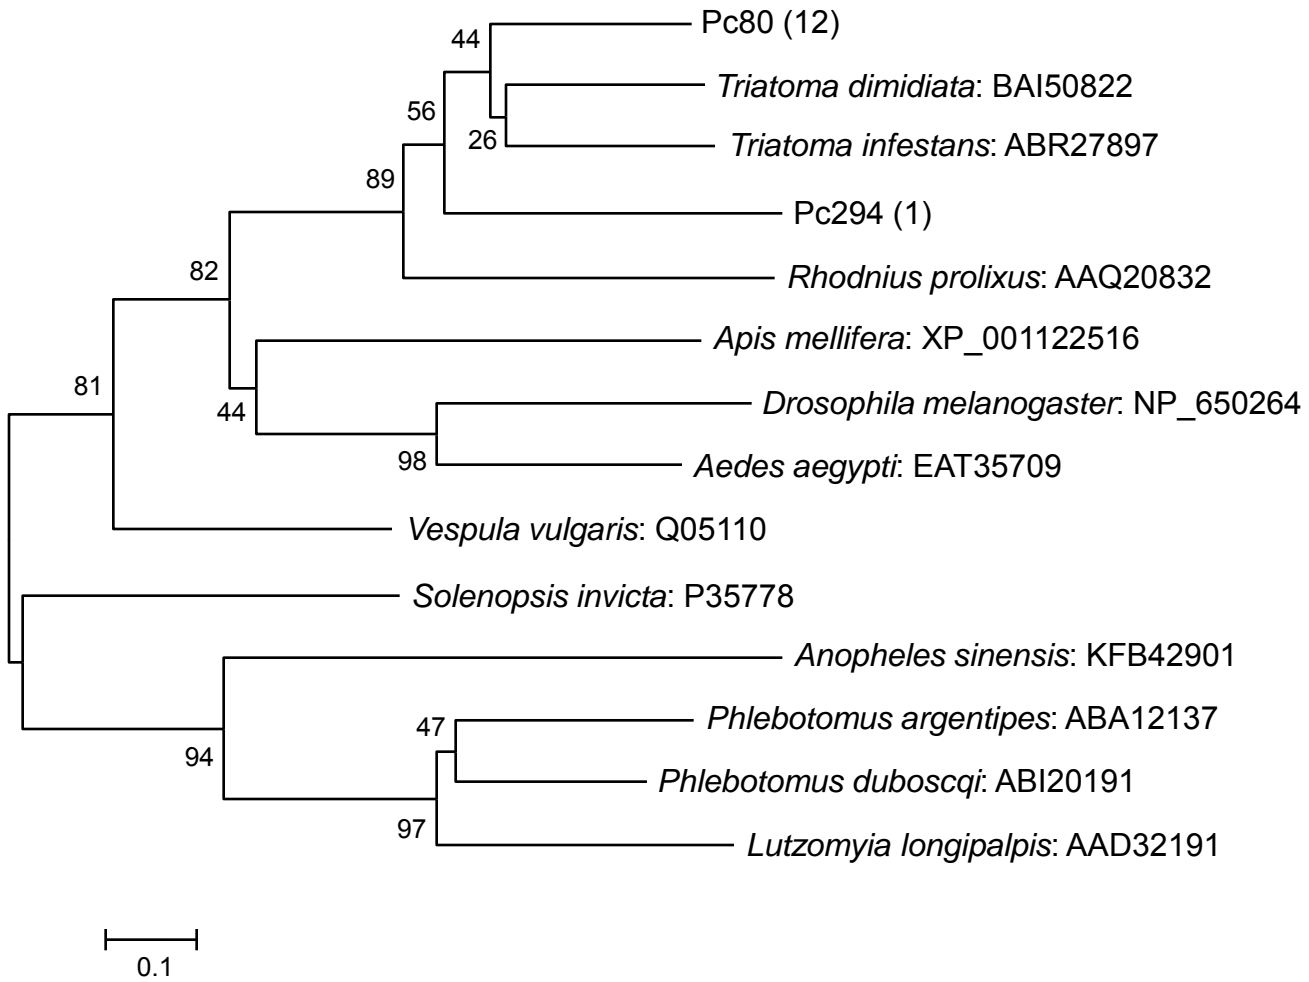

Fig. S4

|             |                                                                 |     |
|-------------|-----------------------------------------------------------------|-----|
| Pc97        | MLTVFLWRIILAFVAAVYQEEKDLLDFSNITSKISLYPHRDVEPTSVEASPEIDSSSEHG    | 60  |
| Ti trypsin  | MNYLYLLIGLVVVVEVP-----HAHTQEGEDDDEDSSEYG                        | 35  |
| Cd protease | MMKWFIL---LVAVVAL-----VQA---DSSEHG                              | 22  |
| * * *       |                                                                 |     |
| Pc97        | --VTPGKMETNCTCGRANR-GGARIIGGRQFQPFYYPFLALIS-LSTDPERPHCGSTIIS    | 116 |
| Ti trypsin  | NRNVPGDKTINCD CGWANK-EDKRIIGGEETNVNEYPMAGLFYKPK-----LLFCGGSIIIT | 92  |
| Cd protease | --VSPGSKGTTACCGWANRSGGSRIVGGTYKANEYPFIVGIATVVGARGYAPFCGGSIIIT   | 80  |
| * * *       |                                                                 |     |
| Pc97        | DRHLLTAAHCTS-KAGGNIGLLVTVAVHEIGN---SPKSYTVEVERLIQHENYNERNLLN    | 172 |
| Ti trypsin  | QYHLLTAAHCTQPFEEVDRIQIVSGEHDQDKVDESSSTVYIDVLNFPHEGYYLIGHRRH     | 152 |
| Cd protease | ANHVI TAAHCTDDI IKARTRTAVLLGSHDRSRP--SSTAVTINVERINQHEKYNANTIAN  | 138 |
| * * *       |                                                                 |     |
| Pc97        | DISLLYLKNPLQLTEVVS PACMPLPGMSVIGKYVRVIGWGATEAYGPMTVLPQKVDLEVI   | 232 |
| Ti trypsin  | DIAIILLKDKIVYTNIVGPACMPTEPIDMIGHKIKVLGWGKLSANGPSSKVLMKVYLNVV    | 212 |
| Cd protease | DISILTLASSINFNKLIGPVCLPLPGLDVSQOTVRVIGWGAERFOCAMTMRPKKLDTTAV    | 198 |
| * * *       |                                                                 |     |
| Pc97        | STEKCHEYWQLQVATDPVTQICRMWENKSACHGDSGGPVVWLDPDTNRYTSVGI VSFGLP   | 292 |
| Ti trypsin  | PLEECNNTHEYIGLVE-RRQICTYHPTKDS COGDSGGPLLWLDREINRYVLAAVTSYGLS   | 271 |
| Cd protease | SPAQCAA IWRGLVSATNPTQVCTLSKKETACOGDSGGPVVWRDPQTNRYTLIGLVSF GAA  | 258 |
| * * *       |                                                                 |     |
| Pc97        | CKSSVFNMDTSVVSYPWIMKGI EATTPGRKLC TKIVN                         | 330 |
| Ti trypsin  | CATDVEGVNTNISYYPWIKVVAETRPEAPICTKQN-                            | 308 |
| Cd protease | CTDEKPTVNT RVAAYLPWIKQOIAATKPAG-VCTKA--                         | 258 |

|       |                                                                                                                                                                                                                                                                                                       |     |
|-------|-------------------------------------------------------------------------------------------------------------------------------------------------------------------------------------------------------------------------------------------------------------------------------------------------------|-----|
| Pc237 | MK <b>F</b> VT <b>V</b> IA <b>V</b> VC <b>Y</b> LF <b>V</b> AT <b>N</b> SL <b>T</b> TP <b>S</b> SR <b>S</b> DS <b>L</b> EV <b>L</b> E <b>K</b> CS <b>N</b> EN <b>N</b> IS <b>L</b> LI <b>A</b> DK <b>L</b> V <b>K</b> H <b>T</b> K <b>P</b> V <b>S</b> N                                              | 60  |
| Td76  | MR <b>I</b> VT <b>V</b> IA <b>V</b> VC <b>Y</b> LF <b>V</b> V <b>N</b> NC <b>L</b> TP <b>S</b> SP <b>G</b> T <b>A</b> S <b>L</b> EV <b>L</b> E <b>K</b> CS <b>E</b> NN <b>V</b> Q <b>P</b> LI <b>A</b> DK <b>L</b> V <b>K</b> H <b>T</b> Q <b>A</b> V <b>S</b> N                                      | 60  |
| Pc237 | R <b>D</b> E <b>K</b> CL <b>L</b> SC <b>F</b> L <b>K</b> ER <b>G</b> Y <b>Y</b> V <b>N</b> GE <b>I</b> D <b>T</b> E <b>K</b> IL <b>O</b> Y <b>L</b> K <b>T</b> IL <b>S</b> D <b>E</b> K <b>Y</b> K <b>R</b> LE <b>G</b> T <b>F</b> K <b>T</b> CV <b>S</b> K <b>V</b> D <b>K</b> N <b>K</b> D <b>T</b> | 120 |
| Td76  | K <b>N</b> E <b>K</b> CL <b>L</b> SC <b>F</b> LE <b>G</b> ME <b>F</b> Y <b>V</b> N <b>G</b> E <b>I</b> K <b>T</b> D <b>K</b> IL <b>O</b> Y <b>L</b> K <b>T</b> IL <b>S</b> D <b>E</b> K <b>Y</b> K <b>N</b> FE <b>G</b> T <b>F</b> K <b>T</b> CV <b>S</b> K <b>V</b> N <b>K</b> T <b>-D</b> E         | 119 |
| Pc237 | CE <b>I</b> AN <b>D</b> V <b>H</b> L <b>C</b> A <b>E</b> PS <b>--</b>                                                                                                                                                                                                                                 | 134 |
| Td76  | CK <b>L</b> AN <b>E</b> V <b>H</b> SC <b>V</b> D <b>V</b> E <b>Q</b> S                                                                                                                                                                                                                                | 135 |
